# Supplementary material
Source: ML conference proceedings conference paper supplement (https://openaccess.thecvf.com/content/CVPR2026/html/Alomari_Lenses_Toward_Polysemous_CVPR_2026_paper.html)
Supplement: Supplementary file 1 [file Alomari_Lenses_Toward_Polysemous_CVPR_2026_supplemental.pdf]

# Lenses: Toward Polysemous Vision–Language Understanding

## Supplementary Material

This supplementary document provides additional analyses and implementation details that complement the main paper on  Lenses. We begin by motivating our five-lens taxonomy (Sec. 1) and describing the full training setup, optimization hyperparameters, and evaluation metrics (Sec. 7). Sec. 9 presents a human validation study of captions and lens labels. We then report zero-shot retrieval results (Sec. 2), backbone-scaling experiments (Sec. 6), and ablations on lens-masked similarity, visual prompt density, and caption-generator dependence (Secs. 3–5). Sec. 11 isolates the role of architecture versus data diversity. Finally, we detail the prompt design and validation pipeline (Sec. 12), analyze how caption lenses route to image lenses and slots (Sec. 8), and provide qualitative retrieval examples.

### 1. Our choice of five lenses

The lenses we use were chosen for clear reasons. Earlier works [1, 3, 13, 16] are aware that visuals can hold more than one type of meaning, but they usually study these meanings from one angle at a time, such as focusing only on literal () content, or only on  figurative,  abstract,  background aspects, or  emotional. We began by adding the *literal* () and *abstract* () lenses to separate concrete details from broader ideas. The Artemis work [1] showed that emotional meaning needs its own space, so we added the *emotional* () lens. Research on figurative and symbolic meaning, including studies on visual associations [3] and recent work on figurative understanding [13], as well as the use of external knowledge for decoding visual symbolism [16], showed the need for a *figurative* () lens. We then added the *background* () lens to capture context, setting, and style. With these five lenses we introduce the idea of polysemous understanding, but this does not mean the concept is limited to only five lenses. They are strong examples based on detailed prior work that show how many layers an image can carry. Our work brings these viewpoints together and applies them to multimodal retrieval so the system can use all these layers of meaning instead of just one.

### 2. Zero-shot retrieval benchmarks

To check that learning lens-aware, polysemous representations does not break conventional literal retrieval, we evaluate  Lenses in a zero-shot setting on COCO [8] and Flickr30K [11], whose captions are mostly literal (Tables 1 and 2). On both benchmarks, the full multi-lens model  Lenses All lags behind the strongest literal specialists such as VLM2Vec [7] and the BGE-VL-MLLM backbone [18], especially for T→I, which is unsurprising given that our

model focuses on diverse retrieval and allocates capacity to non-literal lenses and is not tuned for these datasets. At the same time,  Lenses All remains clearly competitive with CLIP-style and MagicLens baselines, showing that explicitly modeling figurative, emotional, abstract, and background content does not catastrophically harm performance in the standard literal retrieval. More importantly, when we restrict retrieval to the Literal lens, performance on I→T nearly matches or even surpasses the underlying backbone (*e.g.* 75.5 vs. 75.4 R@1 on COCO and 84.7 vs. 80.1 R@1 on Flickr30K), while maintaining strong recall at higher ranks. Together, these results tell a consistent story:  Lenses is not designed to chase state-of-the-art numbers on classic literal benchmarks, but it preserves strong literal retrieval when asked to focus on that lens, while gaining the ability to operate in richer, non-literal interpretive settings that conventional models cannot target.

| Model                                                                                                                                                                            | I → T       |              |              | T → I        |              |              |
|----------------------------------------------------------------------------------------------------------------------------------------------------------------------------------|-------------|--------------|--------------|--------------|--------------|--------------|
|                                                                                                                                                                                  | R@1         | R@5          | R@10         | R@1          | R@5          | R@10         |
| <b>Zero-shot</b>                                                                                                                                                                 |             |              |              |              |              |              |
| OpenAI CLIP-B/16                                                                                                                                                                 | 33.1        | 58.4         | 69.0         | 52.4         | 76.8         | 84.7         |
| Open CLIP-B/16                                                                                                                                                                   | 42.3        | 66.7         | 77.1         | 59.4         | 81.8         | 88.6         |
| EVA-02-CLIP-B/16                                                                                                                                                                 | 42.2        | 66.9         | 76.3         | 58.7         | 80.7         | 88.2         |
| OpenAI CLIP-L/14                                                                                                                                                                 | 36.5        | 61.0         | 71.1         | 56.3         | 79.3         | 86.7         |
| Open CLIP-L/14                                                                                                                                                                   | 46.1        | 70.7         | 79.4         | 62.1         | 83.4         | 90.3         |
| EVA-02-CLIP-L/14                                                                                                                                                                 | 47.5        | 71.2         | 79.7         | 63.7         | 84.3         | 90.4         |
| MagicLens-B                                                                                                                                                                      | 48.9        | 73.9         | 82.5         | 64.8         | 85.5         | 91.2         |
| MagicLens-L                                                                                                                                                                      | 53.1        | 77.4         | 84.9         | <u>67.7</u>  | <u>87.6</u>  | 92.7         |
| VLM2Vec [7]                                                                                                                                                                      | <b>75.7</b> | –            | –            | <b>73.1</b>  | –            | –            |
| BGE-VL-MLLM [18]                                                                                                                                                                 | 75.4        | <b>94.90</b> | <b>98.30</b> | <u>69.91</u> | <b>91.80</b> | <b>96.12</b> |
|  Lenses - All                                                                                 | 67.6        | 90.3         | 94.6         | 53.76        | 82.62        | 91.46        |
|  Lenses -  | <u>75.5</u> | <u>93.6</u>  | <u>97.4</u>  | 60.1         | 86.3         | <u>93.3</u>  |

Table 1. Zero-shot cross-modal retrieval results on COCO [8] (5K test set). We report Recall@K (R@K, %) for image to text (I→T) and text to image (T→I) retrieval. CLIP [12] baselines are taken from prior work, and MagicLens results are from our reproduced CoCa checkpoints, keeping only the best variant per model family. VLM2Vec [7], BGE-VL-MLLM [18], and our  Lenses variants are evaluated in the same zero-shot setting. Best result in each column is in bold; second best is underlined.

### 3. Are our gains from more embeddings or better structure?

To isolate the source of our performance gains, we must determine if they stem merely from increased representational capacity (*i.e.* using multiple embeddings per image) or from the specific structural constraints of our lens-aware masking.

| Model                                                                                                                                                                        | I → T       |             |             | T → I       |             |             |
|------------------------------------------------------------------------------------------------------------------------------------------------------------------------------|-------------|-------------|-------------|-------------|-------------|-------------|
|                                                                                                                                                                              | R@1         | R@5         | R@10        | R@1         | R@5         | R@10        |
| <b>Zero-shot</b>                                                                                                                                                             |             |             |             |             |             |             |
| OpenAI CLIP-B/16                                                                                                                                                             | 62.1        | 85.6        | 91.8        | 81.9        | 96.2        | 98.8        |
| Open CLIP-B/16                                                                                                                                                               | 69.8        | 90.4        | 94.6        | 86.3        | 97.9        | 99.4        |
| EVA-02-CLIP-B/16                                                                                                                                                             | 71.2        | 91.0        | 94.7        | 85.7        | 96.7        | 98.9        |
| OpenAI CLIP-L/14                                                                                                                                                             | 65.2        | 87.3        | 92.0        | 85.2        | 97.3        | 99.0        |
| Open CLIP-L/14                                                                                                                                                               | 75.0        | 92.5        | 95.6        | 88.7        | 98.4        | 99.2        |
| EVA-02-CLIP-L/14                                                                                                                                                             | 77.3        | 93.6        | 96.8        | <u>89.7</u> | 98.6        | 99.2        |
| MagicLens-B                                                                                                                                                                  | 76.2        | 93.7        | 96.5        | 87.9        | 97.7        | <u>99.5</u> |
| MagicLens-L                                                                                                                                                                  | 79.7        | 95.0        | 97.4        | 89.6        | <u>98.7</u> | 99.4        |
| VLM2Vec [7]                                                                                                                                                                  | <u>80.3</u> | 95.0        | 97.4        | <b>94.6</b> | <b>99.5</b> | <b>99.8</b> |
| BGE-VL-MLLM [18]                                                                                                                                                             | 80.1        | <u>95.9</u> | <b>98.6</b> | 78.2        | 93.3        | 96.6        |
|  Lenses - All                                                                               | 77.8        | 94.2        | 96.3        | 63.42       | 86.0        | 92.1        |
|  Lenses -  | <b>84.7</b> | <b>96.0</b> | <u>98.0</u> | 69.3        | 89.8        | 94.4        |

Table 2. Zero-shot cross-modal retrieval results on Flickr30K. We report Recall@K (R@K, %) for image to text (I→T) and text to image (T→I) retrieval. As a general multimodal representation model, VLM2Vec achieves strong T→I and I→T scores compared to existing CLIP-like models. Baseline numbers, including CLIP, MagicLens [17], and VLM2Vec, are sourced from [7]. Best result in each column is in bold, second best is underlined.

In Table 3, we perform an ablation where the underlying image and text embeddings are kept fixed, and only the similarity aggregation mechanism is varied. We compare three paradigms: **global baselines**, which mean doing a standard retrieval using a single pooled embedding per modality (with and without image-side prompts), **unstructured set similarity**, a "No-mask" variant that computes smooth Chamfer similarity across *all* available slots, ignoring lens labels, and **structured lens-masking similarity**, our proposed method, which restricts matching to lens-consistent slots, with and without a global fallback.

**Capacity vs. Structure.** First, we observe that all multi-slot variants significantly outperform the Global-only baselines (e.g., jumping from 55.5 to 58.4 R@1 in T→I). This confirms that compressing complex multimodal semantics into a single vector creates a bottleneck, and that set-based representations are inherently superior.

Crucially, however, structure matters. The *Lens-masked* variant outperforms the *No-mask* variant (87.8 vs 87.1 I→T R@1), indicating that enforcing semantic consistency between slots helps filter out noisy, irrelevant matches. The strongest performance is achieved by the full model (*Lens-masked + Global*), which combines the precision of lens-specific matching with the robustness of a global safety net.

**Fallback Analysis.** Finally, we analyze the behavior of the fallback router in Table 4. The fallback mechanism is triggered when no compatible lens slots overlap between query and target. We find this occurs most frequently for the  Literal lens (13.4%), likely because literal queries can be broad and may not always align with a specific slot configu-

| Similarity Variant                       | Image → Text |             | Text → Image |             |
|------------------------------------------|--------------|-------------|--------------|-------------|
|                                          | R@1          | R@5         | R@1          | R@5         |
| <i>Global Baseline</i>                   |              |             |              |             |
| Global only (w/o prompts)                | 81.4         | 96.2        | 53.2         | 78.2        |
| Global only (w/ prompts)                 | 84.1         | 96.5        | 55.5         | 80.5        |
| <i>Structured Similarity</i>             |              |             |              |             |
| No-mask smooth Chamfer                   | 87.1         | 97.8        | 58.4         | 80.7        |
| Lens-masked smooth Chamfer               | 87.8         | 98.0        | 59.1         | 81.2        |
| <b>Full Model</b> (Lens-masked + Global) | <b>88.3</b>  | <b>98.2</b> | <b>59.4</b>  | <b>81.9</b> |

Table 3. **Disentangling Capacity vs. Structure.** We ablate the similarity module while keeping embeddings fixed. *No-mask* computes similarity across all slots (high capacity, low structure). *Lens-masked* restricts matching to same-lens slots (high structure). The results show that lens alignment adds value beyond simply increasing the number of embeddings.

ration. Conversely, non-literal lenses rely on fallback rarely (3.1% for  Emotional), suggesting that our specialized slots successfully capture the majority of the signal for abstract and affective concepts. This confirms that the fallback path acts strictly as a safety net for edge cases, rather than a primary driver of performance.

| Lens Category                                                                                  | Fallback Rate (%) |
|------------------------------------------------------------------------------------------------|-------------------|
|  Literal     | 13.4              |
|  Figurative | 10.3              |
|  Abstract   | 7.1               |
|  Background | 4.8               |
|  Emotional  | 3.1               |

Table 4. **Global Fallback Usage.** Percentage of queries in the  Lenses test set where the model routes to the global embedding because no lens-consistent slots were found. Low usage on non-literal lenses indicates high coverage by our specialized slots.

#### 4. How dense do visual prompts need to be?

In this experiment, we decouple the contribution of the learned lens embeddings from the explicit visual prompts. Specifically, we investigate whether the model successfully learns a "lens direction" purely through the tokenizer or if it requires the semantic grounding provided by image-conditioned prompts. Table 5 presents the performance as we vary  $z$ , the number of visual prompts injected per lens.

- Token-only ( $z = 0$ ):** Relying solely on learned lens tokens yields respectable performance on the  Literal lens, suggesting the base model already possesses strong literal grounding. However, performance on non-literal lenses suffers significantly (e.g., Figurative I→T R@1 drops to 39.8). This indicates that while learned tokens can signal *intent*, they lack the semantic resolution to bridge the gap to complex abstract concepts on their own.

| Config ( $z$ )       | 📖 Literal   |             |             |             | 🎨 Figurative |             |             |             | 🗨️ Abstract |             |             |             | 🖼️ Background |             |             |             | 🧠 Emotional |             |             |             | All-Lenses  |             |             |             |
|----------------------|-------------|-------------|-------------|-------------|--------------|-------------|-------------|-------------|-------------|-------------|-------------|-------------|---------------|-------------|-------------|-------------|-------------|-------------|-------------|-------------|-------------|-------------|-------------|-------------|
|                      | I→T         |             | T→I         |             | I→T          |             | T→I         |             | I→T         |             | T→I         |             | I→T           |             | T→I         |             | I→T         |             | T→I         |             | I→T         |             | T→I         |             |
|                      | R@1         | R@5         | R@1         | R@5         | R@1          | R@5         | R@1         | R@5         | R@1         | R@5         | R@1         | R@5         | R@1           | R@5         | R@1         | R@5         | R@1         | R@5         | R@1         | R@5         | R@1         | R@5         | R@1         | R@5         |
| $z=0$ (Token-Only)   | 67.4        | 86.7        | 76.2        | 90.2        | 39.8         | 63.6        | 51.2        | 74.8        | 28.0        | 49.4        | 38.9        | 64.6        | 24.5          | 46.1        | 39.6        | 64.5        | 28.3        | 50.2        | 41.8        | 66.8        | 77.3        | 94.3        | 50.0        | 72.5        |
| $z=1$ (Top-1 Prompt) | <b>82.0</b> | <b>93.8</b> | 81.1        | 92.4        | 54.5         | 74.7        | 60.8        | 82.0        | 37.8        | 59.8        | 46.8        | 71.5        | 31.8          | 53.1        | 45.6        | 69.6        | 37.3        | 59.8        | 49.6        | 72.6        | 88.2        | 97.7        | 57.3        | 78.1        |
| $z>1$ (All-Prompts)  | <u>80.3</u> | <u>93.6</u> | <b>81.9</b> | <b>93.6</b> | <b>56.0</b>  | <b>77.6</b> | <b>62.7</b> | <b>85.2</b> | <b>41.3</b> | <b>64.3</b> | <b>51.7</b> | <b>76.6</b> | <b>34.0</b>   | <b>56.5</b> | <b>48.7</b> | <b>74.7</b> | <b>40.4</b> | <b>63.0</b> | <b>51.8</b> | <b>76.8</b> | <b>89.1</b> | <b>98.2</b> | <b>58.9</b> | <b>80.7</b> |

Table 5. **Impact of Visual Prompt Density.** We evaluate retrieval performance on the 🧠 Lenses test set as we vary  $z$ , the number of visual prompts provided per lens. While the model can perform basic literal retrieval with learned tokens alone ( $z=0$ ), explicit visual prompts ( $z \geq 1$ ) are critical for unlocking performance on abstract and figurative lenses. **Bold:** Best; Underline: Second Best.

- Single Prompt ( $z = 1$ ):** Injecting just a single visual prompt per lens catalyzes a dramatic performance leap. Figurative retrieval jumps by nearly 15 absolute percentage points (39.8  $\rightarrow$  54.5), and the overall All-Lenses retrieval improves from 77.3 to 88.2. This confirms that visual prompts serve as essential semantic anchors that guide the model’s attention to specific visual attributes.
- Full Density ( $z > 1$ ):** Utilizing all available prompts yields further gains. While we observe diminishing returns compared to the initial jump from  $z = 0$  to  $z = 1$ , the improvement remains robust for the most subjective lenses (e.g. 🧠 Emotional and 🗨️ Abstract). This suggests that for highly polysemous concepts, a single description is insufficient; a “cloud” of diverse prompts is necessary to fully span the semantic manifold of the lens.

## 5. Are our gains just an artifact of InternVL captions?

Table 6 directly targets the concern that our improvements might simply reflect circularity in the data pipeline, since both the training captions and the image-side prompts are generated by InternVL3.5. To stress-test this, we freeze the 🧠 Lenses retriever model trained on InternVL3.5-38B captions and prompts, keep the InternVL3.5-38B image-side prompts fixed at test time, and vary only the captioning MLLM used to form the text queries and candidates, using captions from Qwen3VL-30B-A3B [15], Grok 4.1 Fast [14], or InternVL3.5-38B [2]. Across all three caption generators, 🧠 Lenses consistently outperforms the corresponding fine-tuned BGE-VL-MLLM baseline in the All setting and remains competitive or better on the more challenging non-literal lenses (Figurative, Abstract, Emotional), even though it has only ever seen InternVL3.5-38B captions during training. Moreover, All R@1/R@5 with Qwen3VL-30B-A3B and Grok 4.1 Fast captions is comparable to, and in several cases slightly higher than, the InternVL caption condition, indicating that our model does not rely on InternVL-specific phrasing. This robustness to swapping the caption generator, together with the consistent margins over the fine-tuned BGE-VL-MLLM baseline, suggests that 🧠 Lenses has learned a genuinely useful lens-aware representation that transfers across independently generated captions rather than

overfitting to stylistic quirks of a single MLLM, substantially mitigating circularity concerns.

## 6. Impact of Backbone Scaling

A natural concern is that our ability to retrieve non-literal semantics might simply reflect the strength of the captioning backbone used to generate prompts, rather than the structure of the retriever itself. Perhaps any sufficiently large InternVL-style model, plugged in as a prompt generator at test time, would make a fixed retriever look good on 🧠 Lenses. To disentangle captioning capacity from retrieval supervision, we run a backbone-scaling study where the 🧠 Lenses retrieval architecture is completely frozen and only the multimodal backbone that produces prompts and lens labels is changed.

In Table 7, we take the 🧠 Lenses retriever trained once on the 🧠 Lenses dataset (whose captions and image-side prompts were generated with InternVL3.5-38B) and re-evaluate it while varying the model that supplies the lens-conditioned prompts and lens labels at inference time. For each backbone we issue exactly the same instruction template; we then feed the resulting prompt and category lens label into the frozen retriever. The prompt text is appended to the image, and the predicted lens determines which slots are allowed to match under our lens-masked similarity. Thus every row in the table uses exactly the same retrieval head, parameters, and training data; the only difference is which captioning backbone (BGE-VL-MLLM or InternVL3.5 with 4B, 8B, 14B, or 38B parameters) is used to generate prompts at test time.

Scaling this captioning backbone gives only limited benefits. Moving from 4B to 14B leads to modest improvements and, in several cases, worse T→I performance than the original configuration: for Figurative, Abstract, Background, and Emotional lenses, T→I R@1 with 4B/8B prompts often trails the BGE-VL-MLLM row. The smaller InternVL variants are particularly brittle on non-literal lenses in the T→I direction, where 4B/8B/14B prompts often trail the BGE-VL-MLLM row despite the retriever being identical across all configurations.

Clear gains appear only when using the 38B captioning backbone. Prompts from InternVL3.5-38B substantially

|                                   | 📖 Literal    |              |              |              | 🗨️ Figurative |              |              |              | 🌀 Abstract   |              |              |              | 🖼️ Background |              |              |              | 🧠 Emotional  |              |              |              | All          |              |              |              |
|-----------------------------------|--------------|--------------|--------------|--------------|---------------|--------------|--------------|--------------|--------------|--------------|--------------|--------------|---------------|--------------|--------------|--------------|--------------|--------------|--------------|--------------|--------------|--------------|--------------|--------------|
|                                   | I→T          |              | T→I          |              | I→T           |              | T→I          |              | I→T          |              | T→I          |              | I→T           |              | T→I          |              | I→T          |              | T→I          |              | I→T          |              | T→I          |              |
|                                   | R@1          | R@5          | R@1          | R@5          | R@1           | R@5          | R@1          | R@5          | R@1          | R@5          | R@1          | R@5          | R@1           | R@5          | R@1          | R@5          | R@1          | R@5          | R@1          | R@5          | R@1          | R@5          | R@1          | R@5          |
| <b>Qwen3VL-30B-A3B (Captions)</b> |              |              |              |              |               |              |              |              |              |              |              |              |               |              |              |              |              |              |              |              |              |              |              |              |
| BGE-VL-MLLM                       | 75.45        | 91.93        | <b>94.84</b> | 99.43        | 53.47         | 76.14        | 58.48        | 81.31        | 31.02        | 52.39        | 45.01        | 70.98        | 37.70         | 60.74        | 57.57        | <b>80.70</b> | 36.82        | 58.60        | 52.29        | 76.96        | 84.83        | 97.16        | 61.12        | 81.71        |
| 🌈 Lenses                          | <b>83.68</b> | <b>94.72</b> | 94.08        | <b>99.50</b> | <b>58.34</b>  | <b>78.44</b> | <b>61.83</b> | <b>83.23</b> | <b>35.42</b> | <b>55.95</b> | <b>48.77</b> | <b>73.72</b> | <b>40.13</b>  | <b>61.93</b> | <b>57.63</b> | 80.61        | <b>38.76</b> | <b>60.59</b> | <b>54.19</b> | <b>77.73</b> | <b>89.29</b> | <b>98.06</b> | <b>63.07</b> | <b>82.96</b> |
| <b>Grok 4.1 Fast (Captions)</b>   |              |              |              |              |               |              |              |              |              |              |              |              |               |              |              |              |              |              |              |              |              |              |              |              |
| BGE-VL-MLLM                       | 69.36        | 87.80        | 86.25        | 96.56        | 60.88         | 82.52        | 57.34        | 79.48        | 27.11        | 48.80        | 43.74        | 70.91        | 26.20         | 46.60        | 48.76        | 73.49        | 31.13        | 52.71        | 46.13        | 71.34        | 83.02        | 96.58        | 56.59        | 78.58        |
| 🌈 Lenses                          | <b>80.80</b> | <b>93.29</b> | <b>88.42</b> | <b>97.16</b> | <b>66.86</b>  | <b>86.33</b> | <b>60.88</b> | <b>82.29</b> | <b>31.17</b> | <b>52.68</b> | <b>48.40</b> | <b>74.21</b> | <b>28.45</b>  | <b>49.49</b> | <b>49.83</b> | <b>75.13</b> | <b>33.76</b> | <b>55.16</b> | <b>48.68</b> | <b>73.68</b> | <b>88.89</b> | <b>98.05</b> | <b>59.68</b> | <b>80.96</b> |
| <b>InternVL3.5-38B (Captions)</b> |              |              |              |              |               |              |              |              |              |              |              |              |               |              |              |              |              |              |              |              |              |              |              |              |
| BGE-VL-MLLM                       | 67.34        | 87.73        | 77.51        | 91.42        | 47.52         | 71.46        | 55.52        | 80.59        | 33.52        | 57.35        | 43.14        | 69.56        | 28.61         | 50.93        | 44.98        | 70.25        | 33.80        | 58.16        | 46.60        | 72.42        | 80.89        | 96.16        | 53.88        | 77.84        |
| 🌈 Lenses                          | <b>80.32</b> | <b>93.60</b> | <b>81.90</b> | <b>93.60</b> | <b>56.02</b>  | <b>77.64</b> | <b>62.69</b> | <b>85.15</b> | <b>41.25</b> | <b>64.34</b> | <b>51.66</b> | <b>76.59</b> | <b>33.97</b>  | <b>56.54</b> | <b>48.65</b> | <b>74.67</b> | <b>40.35</b> | <b>62.95</b> | <b>51.81</b> | <b>76.84</b> | <b>89.09</b> | <b>98.18</b> | <b>58.87</b> | <b>80.74</b> |

Table 6. Effect of captioning backbone on retrieval performance on the 🌈 Lenses test set. For each caption generator (Qwen3VL-30B-A3B, Grok 4.1 Fast, InternVL3.5-38B), we report image-to-text (I→T) and text-to-image (T→I) R@1 and R@5 across the five lenses and in the All setting, comparing a BGE-VL-MLLM baseline fine-tuned on the 🌈 Lenses training split to our full model (🌈 Lenses). Within each caption generator block, the higher score between BGE-VL-MLLM and 🌈 Lenses is shown in **bold**.

improve retrieval on 🌀 Abstract and 🧠 Emotional captions (e.g., Abstract T→I R@1 rises from around 30–33% with 4B/8B/14B to 51.7%), and they boost Figurative T→I performance as well. However, even with 38B prompts, a pronounced gap remains between literal and non-literal retrieval: Literal T→I R@1 reaches 81.9%, whereas Figurative, Abstract, Background, and Emotional lenses remain in the 48–63% range. Because the retriever, loss, and masking are fixed across all rows, this experiment shows that simply scaling the captioning backbone used to generate prompts does not by itself solve polysemous retrieval on 🌈 Lenses; strong non-literal performance still requires explicit lens-aware supervision in the retriever rather than relying solely on a more powerful prompt generator.

## 7. Implementation Details

**Architecture and Parameterization.** We build 🌈 Lenses upon BAAI/BGE-VL-MLLM-S1 [18], a LLaVA-Next style architecture capable of interleaved vision–language processing. Specifically, we utilize a frozen Mistral 7B language backbone and a frozen CLIP-based vision tower. To adapt the model, we introduce Low-Rank Adaptation (LoRA) [6] to the language backbone (rank  $r = 16$ ,  $\alpha = 32$ , dropout 0.1) and keep the image projector fully trainable. While the base model supports variable resolutions, we standardize inputs to  $512 \times 512$  to maintain consistent token sequence lengths [18].

**Training Protocol.** We train 🌈 Lenses for approximately 10,000 steps using the AdamW optimizer. Each GPU processes a mini-batch of 20 examples, and we use 8 GPUs in parallel, giving 160 samples per forward pass. We then accumulate gradients over 4 such micro-steps before each optimizer update, resulting in an effective batch size of 640 samples per optimization step ( $20 \times 8 \times 4$ ). We employ a cosine annealing schedule, decaying the learning rate from  $5 \times 10^{-5}$  to  $1 \times 10^{-6}$  with a weight decay of 0.01. To stabilize training, we clip the global gradient norm at 1.0. Input

processing handles vision tokens and image-side prompts with a maximum sequence length of 3,500 tokens, while caption-only inputs are truncated to 256 tokens. Regarding loss configuration, the multi-positive supervised-contrastive retrieval loss operates with a temperature  $\tau = 0.07$ . For our lens-aware components, we use a temperature of  $\alpha = 16.0$  and a denominator of 2.0 for the smooth Chamfer similarity module. Based on the ablation study in Table 8, we set the loss weights for lens-conditioned alignment ( $\lambda_{\text{slot}}$ ) and intra-image prompt diversity ( $\lambda_{\text{div}}$ ) to 0.05 and 0.01, respectively. Experiments were conducted on a single node with 8 NVIDIA H200 GPUs (141 GB HBM), utilizing mixed precision and gradient checkpointing to optimize memory efficiency.

**Inference and efficiency.** At inference time, users provide only a query; no external lens label is required. The query is encoded into lens-conditioned slots, and retrieval is performed over cached image embeddings using lens-masked similarity with a global fallback when needed. This keeps retrieval in the bi-encoder setting: each image is encoded once into a small set of embeddings in a single pass, and scoring remains a dot-product-style aggregation over cached embeddings. In practice, this introduces about a  $5 \times$  embedding storage overhead relative to a single global embedding while preserving efficient retrieval.

**Token Initialization.** To explicitly model diverse interpretations, we augment the tokenizer with a generic marker, <PROMPT>, and five specific lens tokens (e.g. <EMOTIONAL>, <ABSTRACT>). To facilitate rapid convergence, we initialize these new tokens by copying the learned embedding of the end-of-sequence token (</s>) and adding small isotropic Gaussian noise ( $\sigma = 0.1$ , scaled by feature dimension) to break symmetry. To ensure consistency between input and output representations, we mirror these initialized vectors to the output embedding matrix, training them jointly with the model.

**Baselines.** For a fair comparison, we implement a **Fine-**

| Backbone        | 📖 Literal   |             |             |             | 🗨️ Figurative |             |             |             | 📄 Abstract  |             |             |             | 🖼️ Background |             |             |             | 🧠 Emotional |             |             |             |
|-----------------|-------------|-------------|-------------|-------------|---------------|-------------|-------------|-------------|-------------|-------------|-------------|-------------|---------------|-------------|-------------|-------------|-------------|-------------|-------------|-------------|
|                 | I→T         |             | T→I         |             | I→T           |             | T→I         |             | I→T         |             | T→I         |             | I→T           |             | T→I         |             | I→T         |             | T→I         |             |
|                 | R@1         | R@5         | R@1         | R@5         | R@1           | R@5         | R@1         | R@5         | R@1         | R@5         | R@1         | R@5         | R@1           | R@5         | R@1         | R@5         | R@1         | R@5         | R@1         | R@5         |
| BGE-VL-MLLM     | 67.3        | 87.7        | <u>77.5</u> | <u>91.4</u> | 47.5          | 71.5        | 55.5        | <u>80.6</u> | 33.5        | <u>57.4</u> | <u>43.1</u> | <u>69.6</u> | 28.6          | 50.9        | <u>45.0</u> | <u>70.3</u> | 33.8        | 58.2        | <u>46.6</u> | <u>72.4</u> |
| InternVL3.5-4B  | 80.6        | 93.7        | 69.6        | 86.2        | 50.2          | 71.7        | 47.3        | 71.0        | 32.0        | 53.3        | 30.6        | 54.5        | <u>30.0</u>   | <u>52.7</u> | 27.6        | 50.3        | 34.4        | 58.8        | 30.0        | 53.2        |
| InternVL3.5-8B  | <u>81.1</u> | <u>93.8</u> | 69.3        | 86.1        | 48.9          | 70.5        | 46.3        | 70.0        | 31.2        | 51.9        | 28.5        | 52.7        | 27.2          | 48.9        | 25.1        | 47.4        | <u>36.8</u> | <u>60.9</u> | 33.7        | 58.1        |
| InternVL3.5-14B | <b>82.0</b> | <b>94.2</b> | 74.0        | 89.3        | <b>56.8</b>   | <b>77.7</b> | <u>55.6</u> | 77.0        | <u>34.1</u> | 56.8        | 33.3        | 58.7        | 29.6          | 52.0        | 25.4        | 48.6        | 34.6        | 58.4        | 31.4        | 54.5        |
| InternVL3.5-38B | 80.3        | 93.6        | <b>81.9</b> | <b>93.6</b> | <u>56.0</u>   | <u>77.6</u> | <b>62.7</b> | <b>85.2</b> | <b>41.3</b> | <b>64.3</b> | <b>51.7</b> | <b>76.6</b> | <b>34.0</b>   | <b>56.5</b> | <b>48.7</b> | <b>74.7</b> | <b>40.4</b> | <b>63.0</b> | <b>51.8</b> | <b>76.8</b> |

Table 7. **Effect of Backbone Scaling.** We compare lens-specific retrieval performance when a single frozen 🧠 Lenses retriever is paired at test time with different captioning backbones used to generate lens-conditioned prompts and labels. Scaling the captioning backbone to 38B provides absolute gains, but smaller backbones (4B–14B) often underperform the BGE baseline in Text→Image retrieval, indicating that parameter count alone does not solve polysemous mapping. The retriever is fine-tuned once on the 🧠 Lenses dataset and kept fixed; only the prompt generator backbone varies across rows. **Bold:** Best; Underline: Second best.

| $\lambda_{\text{slot}}$ | 0.1   | <b>0.05</b>  | 0.01  | $\lambda_{\text{div}}$ | 0.1   | 0.05  | <b>0.01</b>  |
|-------------------------|-------|--------------|-------|------------------------|-------|-------|--------------|
| RSUM                    | 463.4 | <b>472.3</b> | 468.9 | RSUM                   | 453.2 | 461.5 | <b>465.6</b> |

Table 8. **Hyperparameter sensitivity.** We report Recall Sum (RSUM) on the validation set. To select the slot weight ( $\lambda_{\text{slot}}$ ) and diversity weight ( $\lambda_{\text{div}}$ ), we train a scaled-down version of our model on 20% of the training data and sweep each coefficient separately. When tuning  $\lambda_{\text{slot}}$  we use the contrastive retrieval loss plus the slot loss with  $\lambda_{\text{div}}=0$ ; when tuning  $\lambda_{\text{div}}$  we use the contrastive loss plus the diversity loss with  $\lambda_{\text{slot}}=0$ .

**tuned BGE-VL-MLLM** baseline. This model shares the identical architecture, data pipeline, and optimization hyperparameters as 🧠 Lenses. However, it is trained solely with a global contrastive loss over image and text embeddings, omitting the lens-specific prompt sets and the Chamfer similarity module.

**Evaluation metrics.** We evaluate along two axes: instance-level retrieval accuracy and lens-specific semantic diversity.

#### Retrieval accuracy.

- **Standard Recall@K (R@K).** The conventional cross-modal retrieval metric. For image-to-text (I→T), a query is counted as correct if any caption associated with the ground-truth image appears in the top- $K$  retrieved captions. For text-to-image (T→I), it is correct if the ground-truth image appears in the top- $K$  retrieved images, regardless of which lens the caption belongs to.
- **Per-category Recall@K (Lens R@K).** A per-lens breakdown of retrieval performance with the full gallery kept intact. For each lens  $\ell \in \{\text{Literal, Figurative, Abstract, Background, Emotional}\}$ , we restrict the set of queries to those annotated with lens  $\ell$ , but we do not modify the retrieval pool: all images (or captions) in the split remain as candidates, with their original positives and negatives. We then compute standard R@K on this restricted query set. This measures how well the model serves queries from each lens without artificially simplifying the candidate set.

**Lens diversity.** To measure how well the model recovers the full spectrum of interpretations for each image, we treat all annotated captions across lenses as positives and report:

- **LensCoverage@10 (LC@10).** For each image, we compute the fraction of its annotated lens categories that appear at least once among the top-10 retrieved positive captions, then average this fraction over images.
- **AllLenses@10 (All@10).** The percentage of images for which every annotated lens category is represented by at least one positive caption within the top-10 retrieved items.
- **Lens DCG@10.** A discounted cumulative gain defined over lens categories rather than individual captions. Each lens contributes at most once, via the highest-ranked caption belonging to that lens; additional captions from the same lens do not increase the score, explicitly rewarding diversity over redundancy.
- **Caption DCG@10.** Standard DCG computed over all positive captions, providing a holistic view of ranking quality without lens-specific diversity penalties.

## 8. Do caption lenses route to consistent image lenses and slots?

Figure 1 probes how our lens-aware similarity actually organizes the image-side slots. For every caption in the 🧠 Lenses validation set, we record which image slot achieves the highest score and summarize the winners by caption lens. The left confusion matrix shows that captions strongly prefer the matching image lens (Literal, Emotional, and Background all peak on their own lens), while the remaining mass is concentrated on semantically adjacent lenses such as Figurative-Abstract, rather than being spread uniformly. The right panel looks inside the slots themselves: each caption lens routes to a small, characteristic subset of slots, with different lenses specializing in different indices and only partial overlap between them. Together, these patterns suggest that the model has learned a soft but structured partition of the image representation space, where different lenses claim

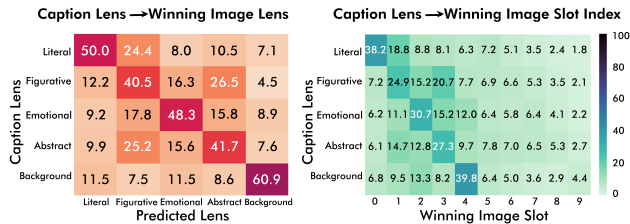

Figure 1. Lens-aware routing on the Lenses validation set. Left: captions usually select image slots from the matching lens, with mass concentrated on the diagonal and nearby related lenses. Right: each caption lens favors a small subset of image slots, indicating that slots specialize by lens instead of collapsing to a single global embedding. Values indicate the percentage of captions in each cell.

different slots rather than collapsing all semantics into one global embedding.

## 9. Human validation of captions and lens labels

To evaluate the quality of the automatic annotations in Lenses we conduct a human study on a subset of the test split. We draw 367 image caption pairs in a balanced way across the five lenses, with 72 Literal, 84 Figurative, 68 Emotional, 78 Abstract, and 65 Background examples. Each item is evaluated by three annotators selected from a group of five trained individuals, which gives 1101 total judgments. For every item, the annotators see the image, the caption, and the dataset lens label. They answer four questions. The first measures caption quality on a four-point scale from Bad to Excellent. The second asks whether they agree with the assigned category. The third asks them to choose the best-fitting lens from the five options or mark the item as none or unsure. The fourth asks whether they used any outside information. Before starting the task, all annotators read a one-page guide with definitions and examples for each lens and complete a short practice stage.

Figure 2 shows the distribution of caption quality scores. After removing one unclear answer, we keep 1100 valid ratings across 366 items. In total 88.0 percent of all ratings fall in the Good or Excellent range. For 90.2 percent of items, at least two annotators give a Good or Excellent score. For 74.6 percent of items, all three annotators assign a Good or Excellent score. These results show that most captions in the study reach a strong level of quality.

Figure 3 shows per-lens statistics from the human evaluation study. Caption quality is consistently high, with 88.0% of items rated Good or Excellent by at least two annotators. The emotional lens achieves the highest rating (95.6%) while abstract shows the lowest (85.9%). Inter-annotator agreement is strong across all lenses. In 87.5% of items, at least two annotators agree the caption fits the dataset lens, with literal captions showing highest agreement (94.4%) and abstract the lowest (76.9%). When selecting the best-

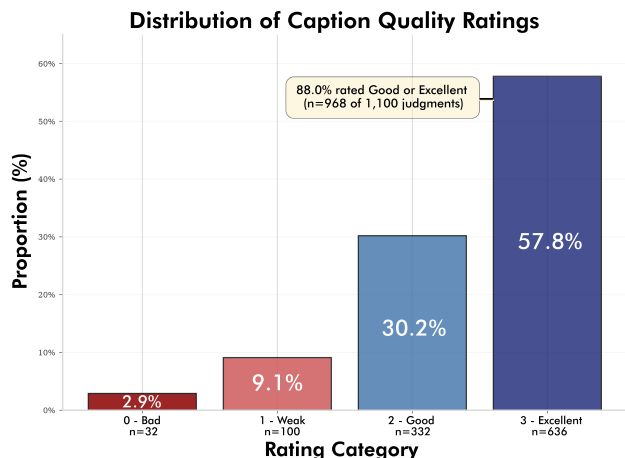

Figure 2. Caption quality ratings over 1,100 valid judgments in the human study.

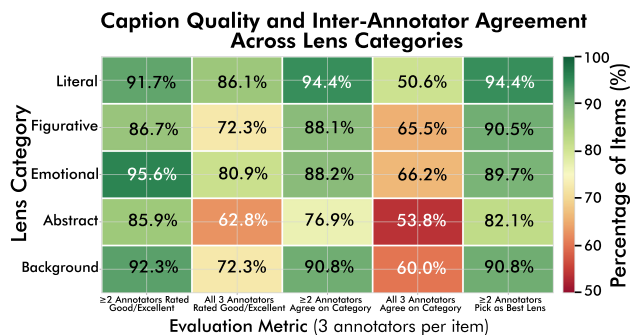

Figure 3. Caption quality and inter-annotator agreement across lens categories. Green indicates higher agreement/quality; Red indicates lower values. Abstract lens shows consistently lower performance.

fitting lens, 96.7% of items have majority agreement and 89.4% match the original dataset category. Among items with unanimous annotator agreement, 99.2% validate the dataset lens assignment. The literal lens demonstrates strongest overall performance while abstract shows lower scores.

We measure inter-annotator agreement using Fleiss'  $\kappa$  for items with three annotations (Figure 4). For the four-level caption quality scale, the agreement value is 52.2% with  $\kappa = 0.15$ , which reflects variation in how annotators judge the difference between Good and Excellent. Grouping the scale into positive and negative ratings increases the agreement value to 83.6% with  $\kappa = 0.23$ . Lens selection shows stronger consistency. The five-way choice with an extra None option reaches 75.7% agreement with  $\kappa = 0.70$ , which indicates substantial agreement on the lens that best fits each caption. The Yes or No category question reaches 78.4% agreement with  $\kappa = 0.22$ , influenced by the large number of Yes responses. Only 4.0% of judgments involve outside information, which suggests that decisions rely on the image, the caption, and the lens definitions. These re-

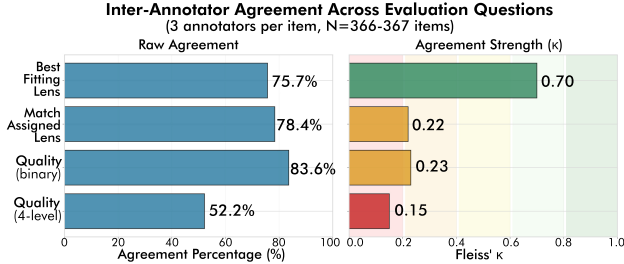

Figure 4. Inter-annotator agreement across three evaluation questions (3 annotators per item,  $N=366-367$  items). *Agreement* shows percentage of raters choosing the same response within each item. *Fleiss'  $\kappa$*  measures agreement strength:  $\kappa < 0.20$  (slight), 0.21–0.40 (fair), 0.41–0.60 (moderate), 0.61–0.80 (substantial), 0.81–1.00 (almost perfect). Best lens selection shows substantial agreement ( $\kappa = 0.70$ ), while quality ratings show high percentage agreement but lower  $\kappa$  due to the 4-level scale and skew toward positive ratings.

sults show that the automatic annotations in Lenses are reliable, with strong caption quality ratings, a clear match between majority lens choice and dataset labels, and substantial agreement on lens selection.

**Relation to human preference.** While a direct human preference study comparing top- $K$  retrieved results across models would provide the most direct measure of retrieval quality in the non-literal setting, we provide several complementary forms of evidence that approximate human preference. Our human validation study (Sec. 9) confirms that 88.0% of captions are rated Good or Excellent, with substantial inter-annotator agreement on lens assignment ( $\kappa = 0.70$ ), establishing that the underlying annotations align with human judgment. Lens-aware metrics such as LC@10 and All@10 measure whether retrieved results cover multiple valid interpretations of an image, while Lens DCG@10 and Caption DCG@10 assess the ranking quality of those interpretations. Transfer results on ArtEmis further evaluate performance on *human-written* emotional captions, providing a complementary test of alignment with human multi-perspective semantics. Together, these results provide converging evidence that Lenses retrieves results that better reflect the diversity of interpretations people assign to the same image. A controlled human preference study over retrieved results remains a valuable direction for future work.

## 10. Qualitative examples from Lenses

Figs. 5 and 6 show random examples from the Lenses dataset, where each image is paired with five captions annotated under our Literal, Figurative, Abstract, Emotional, and Background lenses. Fig. 7 shows random examples of image-side prompts, which are used as lens-specific query anchors. Together, these samples illustrate the range of visual domains covered by the dataset, from natural landscapes and abstract art to everyday scenes and human activities, as well

as the diversity of non-literal semantics expressed through both captions and image-side prompts. They also provide a qualitative sense of how the same image can support multiple, lens-specific readings that go beyond literal description, further motivating the need for lens-aware retrieval models.

## 11. Role of Architecture vs. Data Diversity

A natural question is whether the gains of Lenses stem primarily from the diverse multi-lens training data or from the lens-aware architecture itself. To disentangle these factors, we fine-tune CLIP and BGE-VL-MLLM on the same Lenses training split and compare against our full model in Tab. 9.

|                                      | I→T          |              | T→I          |              |
|--------------------------------------|--------------|--------------|--------------|--------------|
|                                      | R@1          | R@5          | R@1          | R@5          |
| <b>Zero-shot</b>                     |              |              |              |              |
| CLIP                                 | 8.88         | 20.97        | 3.85         | 16.16        |
| <b>Fine-tuned on  Lenses dataset</b> |              |              |              |              |
| CLIP                                 | 47.90        | 77.61        | 28.07        | 49.17        |
| BGE-VL-MLLM                          | 80.89        | 96.16        | 53.88        | 77.84        |
| Lenses - All                         | <b>89.09</b> | <b>98.18</b> | <b>58.87</b> | <b>80.74</b> |

Table 9. Architecture ablation on the Lenses test set. All fine-tuned models are trained on the same Lenses training split; differences therefore reflect architectural capacity for polysemous alignment.

While Lenses shares the same backbone as BGE-VL-MLLM, it replaces the single pooled embedding with lens-conditioned slots and lens-masked matching, complemented by slot-alignment and diversity losses that prevent embedding collapse. Fine-tuning CLIP on the Lenses data yields only 47.90% / 28.07% R@1 (I→T / T→I), confirming that a single global embedding is insufficient for capturing multi-lens semantics. Lenses outperforms CLIP by +41.19 points on I→T R@1. Even compared to the stronger BGE-VL-MLLM baseline trained on identical data, Lenses improves by +8.2 on I→T and +5.0 on T→I R@1, demonstrating that the lens-aware architecture—not merely data diversity, drives the performance gains. Furthermore, the main paper (Tab. 3) shows that lens-masked matching improves over lens-agnostic matching with embeddings held fixed, isolating the structural contribution of the lens-conditioning mechanism.

## 12. Prompt design for data generation and validation

We have used a set of text prompts instructions to drive the entire Lenses data pipeline: image selection, image-side prompt generation, category-conditioned captioning, and multi-stage quality control. All prompts share the same five lens definitions, so that supervision is consistent across images, captions, and image-side prompts.

|                                                                                     |                                                                                                                                                                                                                                                                                                                                                                                                                                                                                                                                                                                                                                                                                                                                    |
|-------------------------------------------------------------------------------------|------------------------------------------------------------------------------------------------------------------------------------------------------------------------------------------------------------------------------------------------------------------------------------------------------------------------------------------------------------------------------------------------------------------------------------------------------------------------------------------------------------------------------------------------------------------------------------------------------------------------------------------------------------------------------------------------------------------------------------|
| 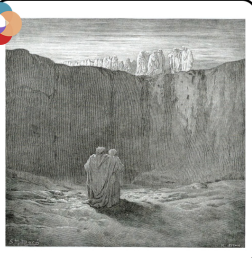   | <p><b>Literal</b> → Two robed figures in dark cloaks stand near a rocky precipice, observing pale spectral shapes on a far-off ridge.</p> <p><b>Figurative</b> → The uneven stone underfoot appears precarious, reflecting the vulnerability of determination in the face of the unknown.</p> <p><b>Abstract</b> → The vast gulf embodies a profound separation between existence and the echoes of the past, or vitality and nothingness.</p> <p><b>Emotional</b> → The barren vista heightens the solitude of the cloaked observers confronting the eerie spectacle.</p> <p><b>Background</b> → Steep rock formations rise vertically against the broad expanse of the cloudy sky, building a feeling of precarious balance.</p> |
|    | <p><b>Literal</b> → Two abstract horses, white and brown, rise up dynamically in a vivid, patterned space, with riders grasping angular objects.</p> <p><b>Figurative</b> → Opposing forces meet: the white horse swirls in disorder with curving lines, the brown one stands firm with defined edges.</p> <p><b>Abstract</b> → A fusion of regularity and wildness, precise angles clashing with flowing contours under a warm sky.</p> <p><b>Emotional</b> → Bright energy bursts in a vortex of movement, capturing a blend of conflict and play in suspended action.</p> <p><b>Background</b> → A fantastical setting of yellow curves and mosaic panels encloses the event, like an illusory stage of nonsense.</p>           |
|   | <p><b>Literal</b> → A lone oak tree perches on a grassy hill beneath a dark, cloudy sky, with a dilapidated wooden fence in the foreground.</p> <p><b>Figurative</b> → The isolated tree endures the ominous clouds, representing steadfastness amid approaching turmoil.</p> <p><b>Abstract</b> → The twisted branches of the tree embody endurance and the passage of time in harsh conditions.</p> <p><b>Emotional</b> → The desolate landscape evokes a sense of isolation and foreboding, with the solitary tree standing vigil.</p> <p><b>Background</b> → The broken wooden fence stretches across the dry grass, highlighting the emptiness of the open field.</p>                                                         |
|  | <p><b>Literal</b> → In a yellow elevator, a fully armored knight holds a briefcase next to a woman in a blue business suit carrying her own case.</p> <p><b>Figurative</b> → The knight's medieval plating hinders rather than helps in today's corporate battles.</p> <p><b>Abstract</b> → Epochs collide: chivalric defense encounters sleek professionalism.</p> <p><b>Emotional</b> → A tense mix of ancient valor and modern efficiency creates an awkward harmony.</p> <p><b>Background</b> → The enclosed yellow walls of the elevator highlight the bizarre temporal mismatch.</p>                                                                                                                                         |
|  | <p><b>Literal</b> → Weathered stone and brick surround a fractured window opening to clear sky.</p> <p><b>Figurative</b> → The damaged frame warns of encroaching deterioration in the aging masonry.</p> <p><b>Abstract</b> → Empty frame opens to vastness, magnifying solitude in resonant emptiness.</p> <p><b>Emotional</b> → Bright azure expanse gazes through the breach, witnessing the brink of downfall.</p> <p><b>Background</b> → Upper masonry layers narrate erosion and past craftsmanship in quiet detail.</p>                                                                                                                                                                                                    |
|  | <p><b>Literal</b> → A woman places her hand against a rain-covered window, her face partially visible through the streaks.</p> <p><b>Figurative</b> → Her hand on the glass creates a boundary between her world and the rainy exterior, symbolizing separation.</p> <p><b>Abstract</b> → Rain distorts the woman's reflection, blending her image with the watery exterior.</p> <p><b>Emotional</b> → The woman's intense expression conveys longing as rain mimics tears on the window.</p> <p><b>Background</b> → Geometric pots with plants sit in the foreground, framing the artwork on the wall.</p>                                                                                                                        |

Figure 5. Random caption samples from  Lenses.

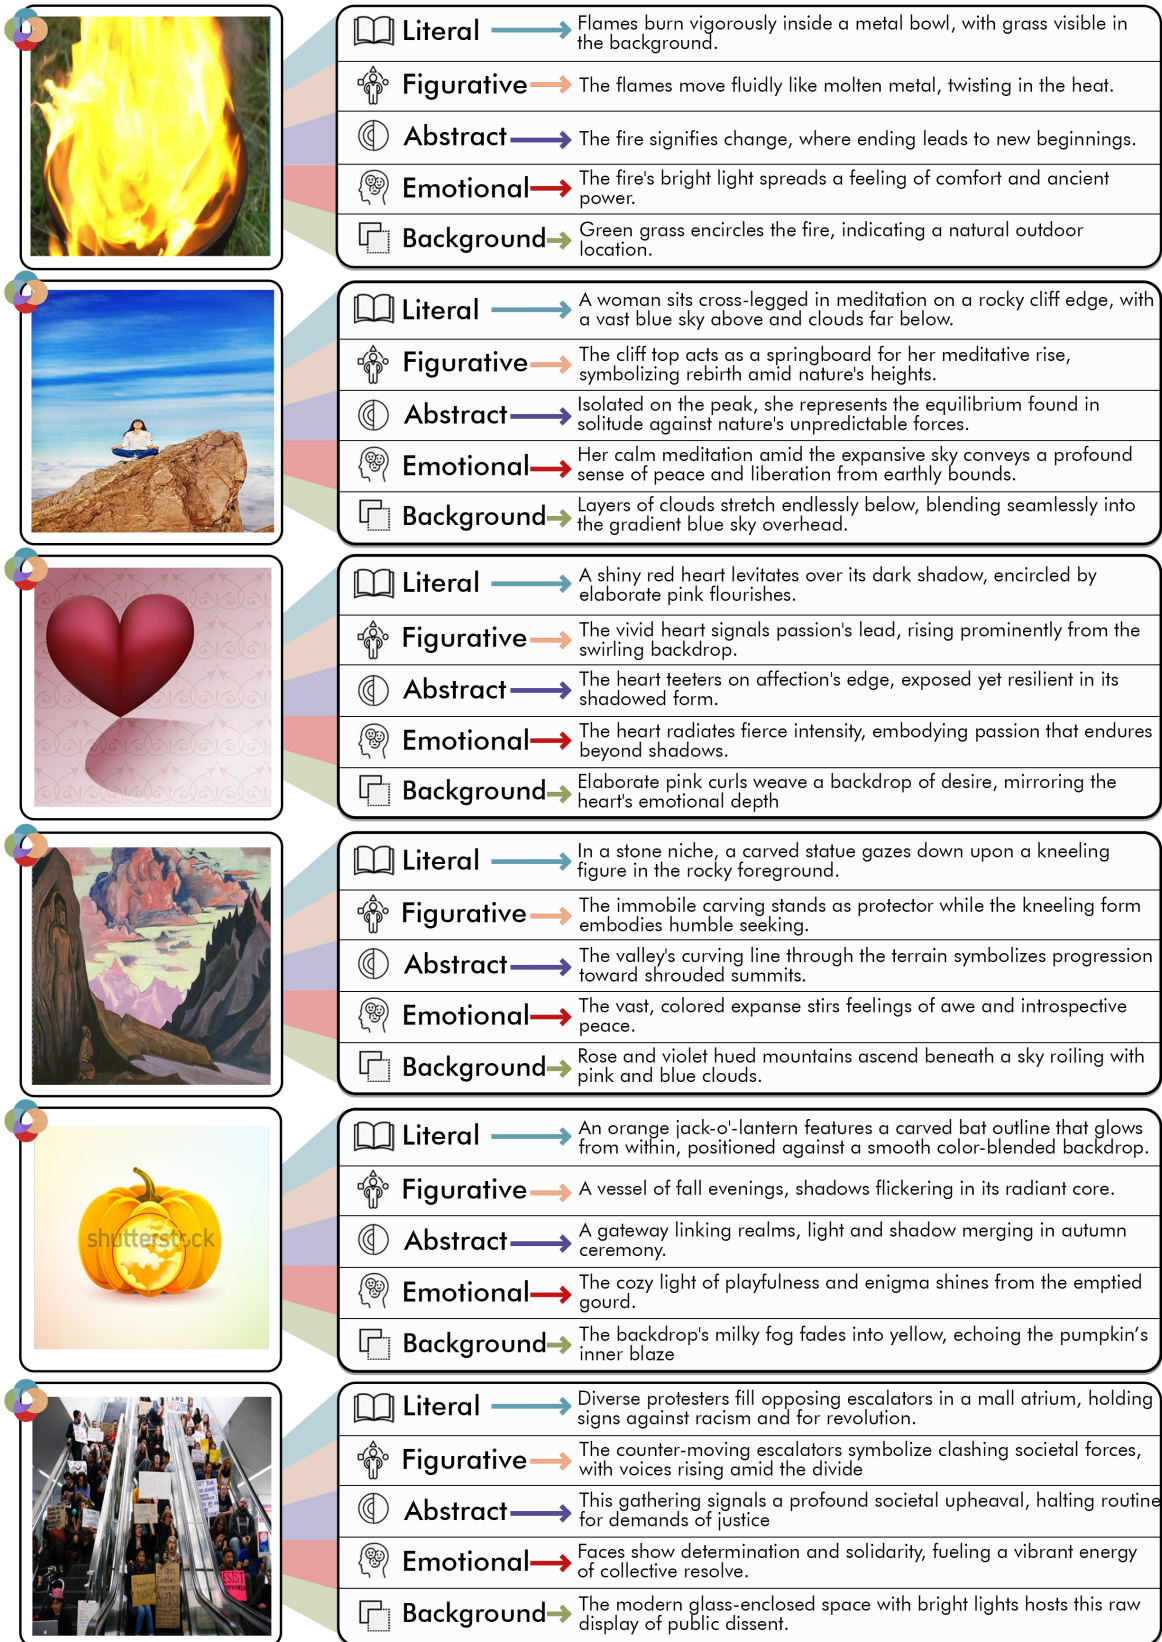

Figure 6. Random caption samples from  Lenses.

|                                                                                     |                                                                                                                                                                                                                                                                                                                                                                                                                                                                                                                                                                                                                                                                                                                                                                                                                                               |
|-------------------------------------------------------------------------------------|-----------------------------------------------------------------------------------------------------------------------------------------------------------------------------------------------------------------------------------------------------------------------------------------------------------------------------------------------------------------------------------------------------------------------------------------------------------------------------------------------------------------------------------------------------------------------------------------------------------------------------------------------------------------------------------------------------------------------------------------------------------------------------------------------------------------------------------------------|
| 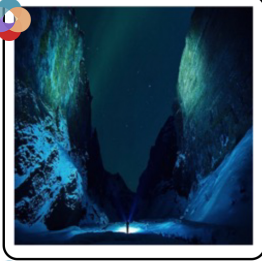   | <p><b>Literal</b> → A lone figure stands in a snow-covered valley, their flashlight casting a beam between towering rock walls under a starry sky.</p> <p><b>Figurative</b> → A fragile beam of light pierces the darkness, symbolizing hope in an overwhelming expanse of frozen wilderness.</p> <p><b>Abstract</b> → The jagged edges of the cliffs mirror the chaotic beauty of a universe in motion, where light and shadow collide.</p> <p><b>Emotional</b> → A vast, unbroken starfield stretches endlessly, whispering the insignificance of human presence in the grand scale of time.</p> <p><b>Background</b> → The valley floor, blanketed in untouched snow, reflects the aurora's glow like a frozen lake of liquid light.</p>                                                                                                   |
|    | <p><b>Literal</b> → A detailed black-and-gray tattoo of a woman's face with tears streaming down her cheeks, wearing an ornate crown, and a rose positioned below her chin.</p> <p><b>Figurative</b> → A crown adorned with intricate patterns, symbolizing a blend of regality and sorrow, encircling a face marked by grief.</p> <p><b>Abstract</b> → Sunburst rays emanating from behind a crowned figure, creating a halo effect that contrasts with the melancholic tears on her face.</p> <p><b>Emotional</b> → A close-up of a tattooed arm, where the texture of the skin and the crisp lines of the artwork blend into a somber, introspective mood.</p> <p><b>Background</b> → A white paper towel background emphasizing the stark, grayscale tattoo, highlighting the isolation of the depicted sorrow.</p>                       |
|   | <p><b>Literal</b> → A muscular superhero stands confidently on a hilltop, hands on hips, wearing a red costume with a yellow lightning bolt emblem and a flowing black cape.</p> <p><b>Figurative</b> → The lightning bolt emblem on the superhero's chest symbolizes raw energy and uncontainable power.</p> <p><b>Emotional</b> → The warm, glowing sunset colors evoke a sense of triumph and hope after a long struggle.</p> <p><b>Background</b> → A radiant sunburst of red and orange rays fills the sky behind a silhouetted city skyline, creating a dramatic backdrop.</p>                                                                                                                                                                                                                                                          |
|  | <p><b>Literal</b> → Golden accents pierce through the darkness like forgotten sunlight, illuminating fragments of a ceremonial garment.</p> <p><b>Figurative</b> → A crown of contradictions - jagged edges softened by flowing lines, representing the duality of power and fragility.</p> <p><b>Abstract</b> → Vertical drips and horizontal slashes create a textured tapestry, where every stroke feels like a heartbeat frozen in time.</p> <p><b>Emotional</b> → The heavy gaze of a masked figure, surrounded by swirling abstraction, evokes a sense of guarded mystery and ancestral authority.</p> <p><b>Background</b> → Two silhouetted birds perched on a stark white ledge, contrasting sharply with the surrounding storm of color and motion.</p>                                                                             |
|  | <p><b>Literal</b> → The nameplates at the statues' bases anchor them in historical context, hinting at legacy and commemoration.</p> <p><b>Figurative</b> → The juxtaposition of a formal, contemplative figure and a dynamic, action-oriented one symbolizes contrasting leadership styles.</p> <p><b>Abstract</b> → The interplay of matte bronze statues and reflective glass panels represents the tension between permanence and modernity.</p> <p><b>Emotional</b> → The pointing gesture of the right statue evokes urgency, while the left statue's crossed arms suggest authority.</p> <p><b>Background</b> → A glass building reflects silhouettes of people, creating a layered visual of static monuments and dynamic human movement.</p>                                                                                         |
|  | <p><b>Literal</b> → A young girl in a playful stance, reaching out to a butterfly, surrounded by a swarm of fluttering butterflies, all depicted as black silhouettes against a white background.</p> <p><b>Figurative</b> → A child's attempt to grasp the ephemeral, symbolizing the human desire to hold onto fleeting moments of beauty and transformation.</p> <p><b>Abstract</b> → The interplay between stillness and motion, representing the balance between human aspiration and the unpredictable nature of life.</p> <p><b>Emotional</b> → A serene and whimsical atmosphere where innocence meets curiosity, evoking a sense of childlike wonder and gentle joy.</p> <p><b>Background</b> → A stark white expanse that amplifies the contrast of dark silhouettes, creating a dreamlike void where imagination takes flight.</p> |

Figure 7. Random image-side prompt samples from  Lenses.

**Image-level filtering.** Before generating annotations, we use Prompt 1 to discard images that do not clearly support multiple non-literal interpretations. Given an image, the model is asked to decide whether it admits *clearly different non-literal interpretations in the Figurative or Abstract categories* and to answer with a single token (YES/NO). The instructions are intentionally conservative: the model should only return YES if it is fully confident that the image supports multiple distinct readings, and it must return NO for images that are purely Literal, purely Emotional, or purely Background focused. This stage prunes away uninformative or unambiguous cases so that downstream prompts operate on images with genuine polysemy.

**Image-side prompt generation.** For images that pass the filter, we generate rich image-side prompts using Prompt 2. The model is instructed to produce a variable-sized set of short prompts, each with a single explicit focus ("Focus" field) and an associated "Category". The prompt text must be self-contained, and visually grounded. The template explicitly encourages syntactic variation (imperative, descriptive, contrastive, rhetorical question), and enforces strong lens control:

- Figurative prompts *must* contain at least one idiom drawn from a curated phrase bank of conventional metaphors (*e.g. house of cards, glass ceiling, Trojan horse*), grouped into thematic families (warnings, traps, fragility, complexity, social dynamics, and so on).
- Emotional and Abstract prompts may optionally use an idiom if it fits naturally.
- Literal and Background prompts are prohibited from using phrase bank items.

The phrase bank is a manually curated lexicon of conventional English idioms and fixed multi word expressions (*e.g. house of cards, elephant in the room, black swan*) that encode abstract notions such as evidence, risk, control, and cascading change. We follow standard linguistic treatments of idioms as conventional, often partly non-compositional expressions [4, 9, 10] and design phrase bank as a small, task-specific analogue of idiom resources used in NLP such as the MAGPIE corpus [5].

At the prompt level, we additionally require that roughly 40% of prompts per image use at least one idiom. Internal checks encourage the generator to stop when additional prompts would be redundant, and to avoid hallucinated objects, repeated heads, or near duplicate paraphrases. The resulting JSON records store Prompt, Focus, and Category, which we later reuse as image-side lens prompts during embedding training.

**Category-conditioned caption generation.** We generate lens-aware captions with Prompt 3. This template asks the model to produce a small set of diverse captions that each

present a different way of *seeing* the same image, while maintaining visual grounding. The prompt explicitly requires coverage across all five lenses. As in the image-side prompt template, each caption is accompanied by a "Focus" and a "Category" field.

**Text-only validation and refinement.** Both image-side prompts and captions are passed through a text-only cleanup stage using Prompt 4. Here, the model receives a JSON object with a "Caption" or "Prompt", its "Focus", and its assigned "Category". The instructions focus on three tasks: lightly edit grammar, spelling, and punctuation and remove machine artifacts (leftover labels, stray quotes, truncation), check that the text is consistent with its Category under the lens definitions, and discard items that cannot be fixed without changing their meaning or hallucinating content. Crucially, the Focus and Category fields are treated as fixed; if they are fundamentally mismatched to the text, the validator is instructed to discard the item by returning an empty string rather than silently reassigning labels. This stage improves fluency and reduces prompt-engineering artifacts before any image-grounded checks.

**Test set visual validation.** Finally, for all test instances we apply an image-conditioned validator, Prompt 5, which takes the IMAGE together with the JSON array of candidate captions or prompts. This prompt reuses the same lens definitions but now treats the image as the source of truth, explicitly checking both well-formedness and visual grounding of each text. The validator must ensure that every concrete object, attribute, and relation mentioned is supported by the image or can be reliably inferred; otherwise, it may either soften or remove the offending fragment or discard the item entirely. As in the text-only stage, it may not change the Category, and it must discard items that cannot be reconciled with their lens label without altering their core meaning.

Listing 1. PROMPT-Image filtering instruction

```
PROMPT-Image filtering

You are given an image.

Lens definitions:
- Literal: Describes concrete objects and actions
  that are directly visible in the image.
- Figurative: Uses metaphor, idiom, symbolism, or
  other non-literal language where the
  intended
  meaning goes beyond what is literally shown (
  for example, "bad apple", "black box",
  "dirty money").
- Emotional: Focuses on the mood or feeling of
  the scene or characters (for example,
  loneliness,
  joy, tension), not just what things look like.
- Abstract: Talks about high-level ideas or
  themes (for example, freedom, chaos, memory,
```

conflict) instead of concrete objects or actions.

- Background: Describes the context, setting, environment, style, or artistic technique that frames the main subject but is not itself the main focus, or focuses on background objects.

**Task:**

1. Decide whether the image supports clearly different non-literal interpretations in the Figurative or Abstract categories.
2. Answer YES only if you are fully confident that the image has multiple distinct possible meanings across these non-literal categories.
3. If you are not completely certain that this requirement is met, answer NO.
4. Images that are only Literal, only Emotional, or only Background focused should also be answered with NO.

**Output format:**

- Do not output captions, categories, or explanations.
- Output exactly one word: YES or NO.

**Listing 2. PROMPT-Image-side prompts instruction**

**PROMPT-Image-side prompts**

You are given an IMAGE. Generate a set of text PROMPTS that emphasize different aspects of the scene so that embeddings capture varied meanings. Do not fix the number: produce as many prompts as are genuinely distinct, and stop when further prompts would overlap.

**Lens definitions:**

- Literal: Describes concrete objects and actions that are directly visible in the image.
- Figurative: Uses metaphor, idiom, symbolism, or other non-literal language where the intended meaning goes beyond what is literally shown.
- Emotional: Focuses on the mood or feeling of the scene or characters (for example, loneliness, joy, tension), not just what things look like.
- Abstract: Talks about high-level ideas or themes (for example, freedom, chaos, memory, conflict) instead of concrete objects or actions.
- Background: Describes the context, setting, environment, style, or artistic technique that frames the main subject but is not itself the main focus, or focuses on background objects.

**RULES**

- One focus per prompt (object, region, relation, texture, color palette, composition cue, or theme).
- Each prompt is self-contained (no "this image" or "this photo"), with 10-28 words.
- Rotate syntax (imperative, descriptive, contrastive clause, rhetorical question) to

increase variety.

- Use the Categories when applicable: Literal, Figurative, Emotional, Abstract, Background.

**CATEGORIES**

- Literal: straightforward, denotative descriptions grounded in visible content.
- Figurative: MUST use at least one phrase from PHRASE\_BANK.
- Emotional: focuses on atmosphere or affect.
- Abstract: treats the scene as an idea or theme.
- Background: reads the context independent of the main subject.

**FIGURATIVE USE**

- Figurative prompts MUST include at least one idiom from PHRASE\_BANK (conventional meaning only).
- Emotional or Abstract prompts MAY include an idiom if it fits naturally.
- Literal or Background prompts MUST NOT contain idioms from PHRASE\_BANK.
- For this image, target about 40 percent of prompts to be idiomatic (round up); avoid reusing the same idiom twice when possible.

**PHRASE\_BANK**

**Warnings & Evidence**

smoking gun; canary in a coal mine; third rail; red flag; bellwether; tipping point; line in the sand; watershed moment; writing on the wall

**Traps, Dilemmas & Costly Wins**

Catch-22; Hobson's choice; Faustian bargain; poisoned chalice; Pyrrhic victory; double-edged sword; pick your poison; rock and a hard place

**Deception, Illusion & Soft Power**

smoke and mirrors; shell game; red herring; Trojan horse; paper tiger; Potemkin village; bait and switch; dog whistle; stalking horse

**Fragility, Risk & Volatility**

house of cards; sword of Damocles; thin ice; tightrope; powder keg; shaky ground; glass jaw; walking a minefield

**Effort, Struggle & Limits**

Sisyphean task; Herculean task; uphill battle; swimming upstream; long slog; running on fumes; burning the candle at both ends; move the needle

**Complexity, Change & Cascades**

Gordian knot; rabbit hole; butterfly effect; domino effect; sea change; paradigm shift; tectonic shift; ripple effect

**Time, Deadlines & Inevitability**

eleventh hour; last straw; point of no return; train has left the station; on borrowed time; wheels already in motion; the clock is ticking

Boundaries, Access & Control  
 velvet rope; walled garden; back door; open secret; revolving door; gatekeeper; skeleton key; closed book

Rarity, Ambition & Extremes  
 black swan; once in a blue moon; lightning in a bottle; needle in a haystack; moonshot; long tail; outlier; edge case

Social Dynamics & Discourse  
 elephant in the room; echo chamber; straw man; moving the goalposts; glass ceiling; party line; chorus of approval; whisper network

Quests, Guides & Obsessions  
 holy grail; white whale; north star; lodestar; Rosetta stone; golden fleece; compass point; guiding light

Consequences & Endings  
 nail in the coffin; slippery slope; pay the piper; burn bridges; day of reckoning; tipping the scales; crying over spilled milk; pandora's box (opened)

Systems, Tech & Operations (modern idioms and jargon widely used metaphorically)  
 single point of failure; bus factor; happy path; garbage in, garbage out; canary release; fail safe; black box; feedback loop

Perspective, Mirrors & Multiplicity  
 house of mirrors; two sides of the same coin; looking glass world; cat's eye view; blind spot; bird's eye view; tunnel vision; double take

Renewal, Cycles & Resilience  
 phoenix rising; second wind; turning the page; fresh start; green shoots; silver lining; tide turns; springboard

Add ons  
 tip of the iceberg; calm before the storm; stacked deck; zero-sum game; moving target; shifting sands; under the radar; in plain sight; back to the drawing board; trial by fire; silver bullet; technical debt; red tape; cut corners; level playing field; break the ice; open the floodgates; paper trail; wild card; ace up the sleeve

OUTPUT (JSON array only)

```
[
  {"Prompt": "<text>", "Focus": "<object/region/idea>",
  "Category": "Literal|Figurative|Emotional|Abstract|Background"},
  ...
]
```

INTERNAL CHECK (do not print)

- Variable set size with clear novelty; stop before redundancy.
- About 40 percent of prompts for this image

contain PHRASE\_BANK idioms; none in Literal or Background.

- Strong visual grounding; no hallucinated objects; minimal head noun or idiom repetition.

**Listing 3. PROMPT-Category-conditioned caption generation instruction**

PROMPT-Category-conditioned caption generation

You are given an IMAGE. Generate a set of diverse, self-contained captions that each present a distinct way of "seeing" the same picture. Maintain visual grounding while weaving in meaning-dense idioms, metaphors, and loaded phrases when appropriate.

- Lens definitions:
- Literal: Describes concrete objects and actions that are directly visible in the image.
  - Figurative: Uses metaphor, idiom, symbolism, or non-literal language where the intended meaning goes beyond what is literally shown.
  - Emotional: Focuses on the mood or feeling of the scene or characters (for example, loneliness, joy, tension), not just what things look like.
  - Abstract: Talks about high-level ideas or themes (for example, freedom, chaos, memory, conflict) instead of concrete objects or actions.
  - Background: Describes the context, setting, environment, style, or artistic technique that frames the main subject but is not itself the main focus, or focuses on background objects.

- GOALS
- Coverage: span literal description, mood, symbolism, setting, and style.
  - Figurative control: add idioms or metaphors only when they naturally fit visible elements.
  - Non-overlap: each caption must highlight a different facet (no near duplicates).

- MANDATES ABOUT PHRASE\_BANK
- For every Figurative caption, you MUST include at least one phrase from PHRASE\_BANK and use it in its conventional sense.
  - Emotional or Abstract captions MAY include a PHRASE\_BANK item if it naturally fits.
  - Literal and Background captions SHOULD NOT use PHRASE\_BANK items.
  - Across the whole set for this image, ensure at least 40 percent of captions use at least one PHRASE\_BANK item.

- METHOD (think, then write)
- 1) Parse the scene: salient objects, relations, composition cues (rule of thirds, symmetry or leading lines), materials or textures, colors, foreground or background, and any actions.
  - 2) Map visible concretes to abstract themes (risk, fragility, power, isolation, renewal,

deception, scarcity, etc.). Consider candidate idioms whose meanings match these themes.  
3) For each caption, pick ONE focus and ONE rhetorical device set (if any). Keep it concise (8-22 words), standalone (no "this image" or "this photo"), and free of brand names or private data.

CATEGORIES (produce at least one caption per category)

- Literal: straightforward, denotative description grounded in visible content.
- Figurative: MUST use at least one phrase from PHRASE\_BANK.
- Emotional: emphasizes atmosphere or affect.
- Abstract: presents the scene as an idea or theme.
- Background: reads the context independently of the main subject.

STYLE GUARDRAILS

- Faithfulness: no hallucinated objects; figurative language must align with what is visible.
- Diversity: vary syntax and vocabulary; avoid repeating the same idiom family or head nouns.
- Safety: avoid stereotypes and outdated or offensive expressions.

PHRASE\_BANK (curated; choose zero, one, or two per caption as allowed above)

Warnings & Evidence

smoking gun; canary in a coal mine; third rail; red flag; bellwether; tipping point; line in the sand; watershed moment; writing on the wall

Traps, Dilemmas & Costly Wins

Catch-22; Hobson's choice; Faustian bargain; poisoned chalice; Pyrrhic victory; double-edged sword; pick your poison; rock and a hard place

Deception, Illusion & Soft Power

smoke and mirrors; shell game; red herring; Trojan horse; paper tiger; Potemkin village; bait and switch; dog whistle; stalking horse

Fragility, Risk & Volatility

house of cards; sword of Damocles; thin ice; tightrope; powder keg; shaky ground; glass jaw; walking a minefield

Effort, Struggle & Limits

Sisyphean task; Herculean task; uphill battle; swimming upstream; long slog; running on fumes; burning the candle at both ends; move the needle

Complexity, Change & Cascades

Gordian knot; rabbit hole; butterfly effect; domino effect; sea change; paradigm shift; tectonic shift; ripple effect

Time, Deadlines & Inevitability  
eleventh hour; last straw; point of no return; train has left the station; on borrowed time; wheels already in motion; the clock is ticking

Boundaries, Access & Control

velvet rope; walled garden; back door; open secret; revolving door; gatekeeper; skeleton key; closed book

Rarity, Ambition & Extremes

black swan; once in a blue moon; lightning in a bottle; needle in a haystack; moonshot; long tail; outlier; edge case

Social Dynamics & Discourse

elephant in the room; echo chamber; straw man; moving the goalposts; glass ceiling; party line; chorus of approval; whisper network

Quests, Guides & Obsessions

holy grail; white whale; north star; lodestar; Rosetta stone; golden fleece; compass point; guiding light

Consequences & Endings

nail in the coffin; slippery slope; pay the piper; burn bridges; day of reckoning; tipping the scales; crying over spilled milk; Pandora's box (opened)

Systems, Tech & Operations (modern idioms and jargon widely used metaphorically)

single point of failure; bus factor; happy path; garbage in, garbage out; canary release; fail safe; black box; feedback loop

Perspective, Mirrors & Multiplicity

house of mirrors; two sides of the same coin; looking glass world; cat's eye view; blind spot; bird's eye view; tunnel vision; double take

Renewal, Cycles & Resilience

phoenix rising; second wind; turning the page; fresh start; green shoots; silver lining; tide turns; springboard

OUTPUT (JSON array only; no extra text)

```
[
  {
    "Caption": "<text>",
    "Focus": "<object/region/idea>",
    "Category": "Literal|Figurative|Emotional|Abstract|Background"
  },
  ...
]
```

QUALITY CHECK (internal; do not print your notes)

- If an idiom would mislead (for example, "smoking gun" without any evidence motif), choose a different phrase.
- Ensure at least 70 percent token difference between captions; vary heads and modifiers.
- Prefer concrete to abstract metaphors; keep

meanings conventional and consistent with the visual evidence.

#### Listing 4. PROMPT-Validation and refinement instruction

PROMPT-Validation and refinement

You are a validator and light editor for captions and prompts in a vision-language dataset.

Each input item is a JSON object:

```
{
  "Caption" | "Prompt": "<candidate text>",
  "Focus": "<object/region/idea>",
  "Category": "Literal|Figurative|Emotional|
  Abstract|Background"
}
```

Your job is to validate and, when needed, minimally revise each item so that texts are well formed, free of artifacts, and consistent with their assigned Category.

Lens definitions (for Category):

- **Literal:** Describes concrete objects and actions that are directly visible in the image.
- **Figurative:** Uses metaphor, idiom, symbolism, or non-literal language where the intended meaning goes beyond what is literally shown.
- **Emotional:** Focuses on the mood or feeling of the scene or characters (for example, loneliness, joy, tension), not just what things look like.
- **Abstract:** Talks about high-level ideas or themes (for example, freedom, chaos, memory, conflict) instead of concrete objects or actions.
- **Background:** Describes the context, setting, environment, style, or artistic technique that frames the main subject but is not itself the main focus, or focuses on background objects.

Validation rules:

1. Grammar and fluency
  - Fix grammar, spelling, and punctuation.
  - Remove machine artifacts (leftover labels, extra quotes, truncation, placeholders).
  - Keep the original meaning and perspective as much as possible.
2. Category alignment
  - Check that the text matches its Category according to the definitions above.
  - Do not change Focus or Category. If they clearly cannot match, discard the item.
3. Discard rule
  - If a text cannot be fixed without changing its meaning or hallucinating content, discard it by outputting an empty string for the Caption/Prompt value.

OUTPUT (JSON array only; no extra text)

```
[
  {
    "Caption" | "Prompt": "<final text or \"\" if
```

```
discarded>",
    "Focus": "<object/region/idea>",
    "Category": "Literal|Figurative|Emotional|
    Abstract|Background"
  },
  ...
]
```

#### Listing 5. PROMPT-Test set validation instruction

PROMPT-Test set validation

You are a visual grounding validator and light editor for test set captions and prompts in a vision-language dataset, using the image as the source of truth.

For each test instance you receive:

- One IMAGE.
- A JSON array of items of the form:

```
{
  "Caption" | "Prompt": "<candidate text>",
  "Focus": "<object/region/idea>",
  "Category": "Literal|Figurative|Emotional|
  Abstract|Background"
}
```

Your job is to check that every text is:

- 1) well formed and free of obvious artifacts, and
- 2) visually grounded in the IMAGE and consistent with its Category.

If an item fails these checks and cannot be fixed with small edits, you must discard it.

Lens definitions (for Category):

- **Literal:** Describes concrete objects and actions that are directly visible in the image.
- **Figurative:** Uses metaphor, idiom, symbolism, or other non-literal language where the intended meaning goes beyond what is literally shown, while still being conceptually connected to the visible content.
- **Emotional:** Focuses on the mood or feeling of the scene or characters (for example, loneliness, joy, tension), not just what things look like.
- **Abstract:** Talks about high-level ideas or themes (for example, freedom, chaos, memory, conflict) instead of concrete objects or actions, but still rooted in what the image suggests.
- **Background:** Describes the context, setting, environment, style, or artistic technique that frames the main subject but is not itself the main focus, or focuses on background objects.

Verification rules:

1. Grammar and artifacts
  - Fix grammar, spelling, and punctuation when needed.
  - Remove machine artifacts such as leftover labels ("Caption:", "Category:", indices), stray quotes, placeholders ("<text>", "<object>"), or truncated fragments.

- Keep the original intention and perspective as much as possible.

## 2. Visual grounding

- Check that all concrete objects, attributes, actions, and relations mentioned in the text are supported by the IMAGE.
- If a specific object, detail, or relation is not visible or cannot be reliably inferred from the IMAGE, either:
  - \* remove or soften that part of the text while keeping the rest grounded, or
  - \* if that would destroy the main meaning, discard the item.
- Do not introduce new objects, actions, or specific details that are not seen in the IMAGE.

## 3. Category alignment

- Check that the text matches its Category according to the lens definitions.
- Do not change Category or Focus. Instead:
  - \* If the text can be edited slightly so that it matches its Category and remains visually grounded, perform the edit.
  - \* If the text clearly cannot match the Category without changing its core meaning, discard the item (set the text to an empty string).

## 4. Figurative and idiomatic content

- Figurative items may use idioms or metaphors, but they must remain conceptually compatible with the IMAGE (no idioms that imply events or evidence that are clearly absent).
- Do not add new idioms. You may remove or simplify them if they conflict with the visual content.

### Discard rule:

- If a text is severely ungrammatical, dominated by artifacts, clearly ungrounded in the IMAGE, or fundamentally mismatched with its Category in a way that cannot be fixed by small edits, discard it by setting its Caption/Prompt value to "".

### OUTPUT (JSON array only; no extra text)

Return a JSON array with the same structure as the input, where each item is:

```
{
  "Caption" | "Prompt": "<final text or \"\" if
  discarded>",
  "Focus": "<object/region/idea>",
  "Category": "Literal|Figurative|Emotional|
  Abstract|Background"
}
```

- If you apply minor corrections, output the corrected text.
- If you decide to discard an item, output an empty string "" for the Caption/Prompt value.

## References

- [1] Panos Achlioptas, Maks Ovsjanikov, Kilichbek Haydarov, Mohamed Elhoseiny, and Leonidas J Guibas. Artemis: Affective language for visual art. In *Proceedings of the IEEE/CVF Conference on Computer Vision and Pattern Recognition*, pages 11569–11579, 2021. 1
- [2] Zhe Chen, Jiannan Wu, Wenhai Wang, Weijie Su, Guo Chen, Sen Xing, Muyan Zhong, Qinglong Zhang, Xizhou Zhu, Lewei Lu, et al. Internvl: Scaling up vision foundation models and aligning for generic visual-linguistic tasks. In *Proceedings of the IEEE/CVF conference on computer vision and pattern recognition*, pages 24185–24198, 2024. 3
- [3] Noa Garcia and George Vogiatzis. How to read paintings: semantic art understanding with multi-modal retrieval. In *Proceedings of the European Conference on Computer Vision (ECCV) Workshops*, pages 0–0, 2018. 1
- [4] Sam Glucksberg and Matthew S McGlone. *Understanding figurative language: From metaphor to idioms*. Number 36. Oxford University Press, 2001. 11
- [5] Hessel Haagsma, Johan Bos, and Malvina Nissim. Magpie: A large corpus of potentially idiomatic expressions. In *Proceedings of the Twelfth Language Resources and Evaluation Conference*, pages 279–287, 2020. 11
- [6] Edward J Hu, Yelong Shen, Phillip Wallis, Zeyuan Allen-Zhu, Yuanzhi Li, Shean Wang, Liang Wang, Weizhu Chen, et al. Lora: Low-rank adaptation of large language models. *Iclr*, 1(2):3, 2022. 4
- [7] Ziyang Jiang, Rui Meng, Xinyi Yang, Semih Yavuz, Yingbo Zhou, and Wenhui Chen. VLM2vec: Training vision-language models for massive multimodal embedding tasks. In *The Thirtieth International Conference on Learning Representations*, 2025. 1, 2
- [8] Tsung-Yi Lin, Michael Maire, Serge Belongie, James Hays, Pietro Perona, Deva Ramanan, Piotr Dollár, and C Lawrence Zitnick. Microsoft coco: Common objects in context. In *Computer Vision—ECCV 2014: 13th European Conference, Zurich, Switzerland, September 6–12, 2014, Proceedings, Part V 13*, pages 740–755. Springer, 2014. 1
- [9] Rosamund Moon. *Fixed Expressions and Idioms in English: A Corpus-Based Approach*. Oxford University Press, 1998. 11
- [10] Geoffrey Nunberg, Ivan A Sag, and Thomas Wasow. Idioms. *Language*, 70(3):491–538, 1994. 11
- [11] Bryan A Plummer, Liwei Wang, Chris M Cervantes, Juan C Caicedo, Julia Hockenmaier, and Svetlana Lazebnik. Flickr30k entities: Collecting region-to-phrase correspondences for richer image-to-sentence models. In *Proceedings of the IEEE international conference on computer vision*, pages 2641–2649, 2015. 1
- [12] Alec Radford, Jong Wook Kim, Chris Hallacy, Aditya Ramesh, Gabriel Goh, Sandhini Agarwal, Girish Sastry, Amanda Askell, Pamela Mishkin, Jack Clark, et al. Learning transferable visual models from natural language supervision. In *International conference on machine learning*, pages 8748–8763. PMLR, 2021. 1
- [13] Arkadiy Saakyan, Shreyas Kulkarni, Tuhin Chakrabarty, and Smaranda Muresan. Understanding figurative meaning

through explainable visual entailment. In *Proceedings of the 2025 Conference of the Nations of the Americas Chapter of the Association for Computational Linguistics: Human Language Technologies (Volume 1: Long Papers)*, pages 1–23, 2025. [1](#)

- [14] xAI. Grok 4.1, 2025. Large language model developed by xAI. [3](#)
- [15] An Yang, Anfeng Li, Baosong Yang, Beichen Zhang, Binyuan Hui, Bo Zheng, Bowen Yu, Chang Gao, Chengen Huang, Chenxu Lv, et al. Qwen3 technical report. *arXiv preprint arXiv:2505.09388*, 2025. [3](#)
- [16] Ron Yosef, Yonatan Bitton, and Dafna Shahaf. Irfl: Image recognition of figurative language. In *Findings of the Association for Computational Linguistics: EMNLP 2023*, pages 1044–1058, 2023. [1](#)
- [17] Kai Zhang, Yi Luan, Hexiang Hu, Kenton Lee, Siyuan Qiao, Wenhui Chen, Yu Su, and Ming-Wei Chang. MagicLens: Self-supervised image retrieval with open-ended instructions. In *Proceedings of the 41st International Conference on Machine Learning*, pages 59403–59420. PMLR, 2024. [2](#)
- [18] Junjie Zhou, Yongping Xiong, Zheng Liu, Ze Liu, Shitao Xiao, Yueze Wang, Bo Zhao, Chen Jason Zhang, and Defu Lian. Megapairs: Massive data synthesis for universal multi-modal retrieval. In *Proceedings of the 63rd Annual Meeting of the Association for Computational Linguistics (Volume 1: Long Papers)*, pages 19076–19095, 2025. [1](#), [2](#), [4](#)
